# Supplementary material for: Application and Validation of the Tricuspid Annular Plane Systolic Excursion/Systolic Pulmonary Artery Pressure Ratio in Patients with Ischemic and Non-Ischemic Cardiomyopathy
Source: MDPI journal article supplement (doi:10.3390/diagnostics11122188), 2021-11-24
Supplement: s1 [file s1]

A

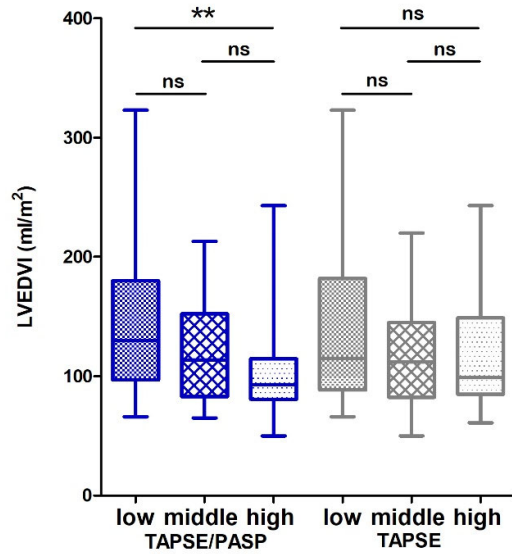

B

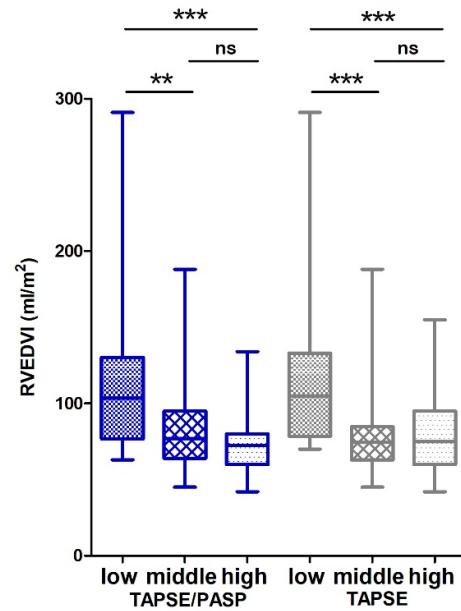

**Supplementary Figure S1.** Box showing CMR characteristics of TAPSE/PASP and TAPSE tertiles. Shown are values for (A) RVEDVI and (B) LVEDVI divided according to TAPSE/PASP and TAPSE tertiles. Boxes represent median with IQR. ns, not significant, \*\* $p < 0.01$ , \*\*\* $p < 0.001$ .

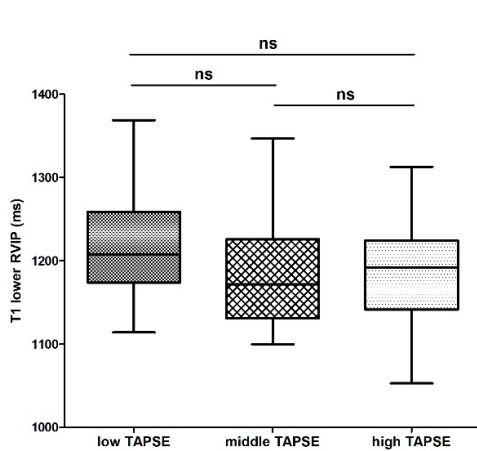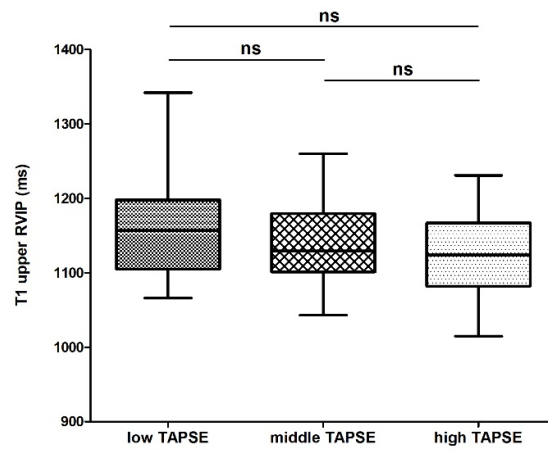

A

B

**Supplementary Figure S2.** Box and scatter plots showing CMR characteristics of TAPSE tertiles. Shown are values for T1 relaxation times in (A) T1 lower RVIP and (B) T1 upper RVIP divided according to TAPSE tertiles. Boxes represent median with IQR. ns, not significant, \* $p < 0.05$ , \*\* $p < 0.01$ , \*\*\* $p < 0.001$ .

**Supplementary Table S1.** Clinical characteristics of TAPSE/PASP tertiles.

|                                                    | TAPSE/PASP low<br><0.38 mm/mmHg | TAPSE/PASP middle<br>0.38–0.63 mm/mmHg | TAPSE/PASP High<br>>0.63 mm/mmHg | p-Value |
|----------------------------------------------------|---------------------------------|----------------------------------------|----------------------------------|---------|
|                                                    | n = 37                          | n = 36                                 | n = 38                           |         |
| Age, y, median (IQR)                               | 70 (58–76)                      | 69 (63–77)                             | 67 (59–74)                       | 0.69    |
| Female sex, n, (%)                                 | 10 (27)                         | 10 (28)                                | 12 (32)                          | 0.90    |
| BMI, kg/m <sup>2</sup> , mean (± SD)               | 27 ± 4                          | 28 ± 5                                 | 27 ± 4                           | 0.46    |
| BSA, m <sup>2</sup> , mean (± SD)                  | 1.96 ± 0.22                     | 2.03 ± 0.25                            | 1.99 ± 0.18                      | 0.51    |
| <b>Cardiovascular risk factors</b>                 |                                 |                                        |                                  |         |
| Hypertension, n, (%)                               | 26 (70)                         | 28 (82)                                | 29 (76)                          | 0.48    |
| Diabetes, n, (%)                                   | 14 (38)                         | 12 (35)                                | 9 (24)                           | 0.36    |
| Insulin, n, (%)                                    | 2 (5)                           | 4 (11)                                 | 4 (11)                           | 0.71    |
| Dyslipidemia, n, (%)                               | 21 (58)                         | 22 (67)                                | 16 (44)                          | 0.19    |
| <b>Clinical history</b>                            |                                 |                                        |                                  |         |
| Chronic pulmonary disease, n, (%)                  | 4 (11)                          | 7 (20)                                 | 6 (16)                           | 0.61    |
| CAD, n, (%)                                        | 23 (62)                         | 21 (58)                                | 23 (61)                          | 0.97    |
| Prior MI, n, (%)                                   | 12 (34)                         | 10 (30)                                | 15 (42)                          | 0.64    |
| Prior PCI, n, (%)                                  | 15 (41)                         | 11 (33)                                | 15 (39)                          | 0.80    |
| Prior CABG, n, (%)                                 | 6 (17)                          | 11 (31)                                | 4 (11)                           | 0.09    |
| Prior stroke/TIA, n, (%)                           | 8 (22)                          | 3 (9)                                  | 6 (16)                           | 0.29    |
| Peripheral artery disease, n, (%)                  | 5 (14)                          | 3 (9)                                  | 2 (5)                            | 0.46    |
| <b>Symptoms</b>                                    |                                 |                                        |                                  |         |
| NYHA ≥ 3, n, (%)                                   | 16 (53)                         | 18 (58)                                | 8 (33)                           | 0.05    |
| Syncope, n, (%)                                    | 2 (6)                           | 4 (11)                                 | 2 (5)                            | 0.65    |
| Prior cardiac decompensation, n, (%)               | 12 (60)                         | 8 (62)                                 | 6 (43)                           | 0.61    |
| <b>Echocardiographic findings</b>                  |                                 |                                        |                                  |         |
| LVEF, %, median (IQR)                              | 28 (25–40)                      | 35 (28–50)                             | 50 (35–55)                       | 0.001   |
| LVEF < 35 %, n, (%)                                | 23 (62)                         | 14 (41)                                | 8 (24)                           | 0.002   |
| LVEDd, mm, mean (± SD)                             | 58 ± 9                          | 56 ± 9                                 | 54 ± 10                          | 0.30    |
| LA, mm, median (IQR)                               | 44 (43–48)                      | 41 (38–45)                             | 40 (37–44)                       | 0.008   |
| IVSd, mm, median (IQR)                             | 10 (9–12)                       | 10 (9–11)                              | 10 (9–12)                        | 0.83    |
| LVPWd, mm, median (IQR)                            | 10 (10–12)                      | 10 (8–11)                              | 10 (9–11)                        | 0.33    |
| RVEDd, mm, median (IQR)                            | 39 (35–44)                      | 33 (30–38)                             | 34 (31–37)                       | 0.002   |
| TAPSE, mm, mean (± SD)                             | 14 ± 4                          | 18 ± 3                                 | 22 ± 3                           | <0.001  |
| PASP, mmHg, median (IQR)                           | 49 (42–55)                      | 40 (34–45)                             | 28 (25–33)                       | <0.001  |
| TAPSE/PASP, mm/mmHg, median (IQR)                  | 0.28 (0.22–0.34)                | 0.46 (0.42–0.53)                       | 0.74 (0.66–0.81)                 | <0.001  |
| AS ≥/≤ II, n, (%)                                  | 3 (9)                           | 0 (0)                                  | 0 (0)                            | 0.06    |
| MI ≥/≤ II, n, (%)                                  | 9 (26)                          | 6 (18)                                 | 2 (5)                            | 0.047   |
| <b>Biomarker</b>                                   |                                 |                                        |                                  |         |
| Creatinine, mmol/L, median (IQR)                   | 1.14 (0.86–1.44)                | 0.9 (0.79–1.27)                        | 0.84 (0.7–1.02)                  | 0.01    |
| eGFR, ml/min/1.73 m <sup>2</sup> , mean (± SD)     | 72 ± 28                         | 80 ± 26                                | 89 ± 29                          | 0.08    |
| NT-proBNP, pg/ml, median (IQR)                     | 5829 (2084–9318)                | 1933 (807–3950)                        | 542 (341–1376)                   | <0.001  |
| <b>MRI findings</b>                                |                                 |                                        |                                  |         |
| HF, 1/min, median (IQR)                            | 71 (65–86)                      | 70 (66–83)                             | 70 (60–74)                       | 0.26    |
| LVEF, %, median (IQR)                              | 27 (20–38)                      | 30 (24–50)                             | 47 (31–59)                       | 0.001   |
| LVEDV, ml, median (IQR)                            | 246 (186–343)                   | 230 (162–328)                          | 177 (162–221)                    | 0.01    |
| LVEDVI, ml/m <sup>2</sup> , median (IQR)           | 130 (99–168)                    | 114 (86–152)                           | 92 (80–109)                      | 0.004   |
| LVESV, ml, median (IQR)                            | 172 (120–262)                   | 158 (90–235)                           | 102 (74–150)                     | 0.003   |
| LVESVI, ml/m <sup>2</sup> , median (IQR)           | 90 (65–131)                     | 82 (46–111)                            | 51 (36–75)                       | 0.001   |
| LA area, m <sup>2</sup> , mean (± SD)              | 31 ± 7                          | 28 ± 9                                 | 26 ± 7                           | 0.02    |
| RVEF, %, median (IQR)                              | 32 (19–40)                      | 44 (30–50)                             | 50 (42–58)                       | <0.001  |
| RVEDV, ml, median (IQR)                            | 192 (148–248)                   | 170 (141–187)                          | 141 (115–162)                    | <0.001  |
| RVEDVI, ml/m <sup>2</sup> , median (IQR)           | 104 (77–130)                    | 77 (64–95)                             | 73 (60–80)                       | <0.001  |
| RV ESVI, ml/m <sup>2</sup> , median (IQR)          | 66 (52–99)                      | 47 (33–60)                             | 34 (26–44)                       | <0.001  |
| RV ESV, ml, median (IQR), ml, median (IQR)         | 128 (92.5–188.25)               | 97.5 (71–137.75)                       | 70 (55–92)                       | <0.001  |
| RV SV, ml, median (IQR)                            | 61.5 (47.25–78)                 | 58.5 (49–81.75)                        | 68 (53.5–77.5)                   | 0.72    |
| RA area, m <sup>2</sup> , median (IQR)             | 29 (24–36)                      | 25 (24–30)                             | 25 (23–29)                       | 0.10    |
| CI, l/min*m <sup>2</sup> , median (IQR)            | 2.7 (2.1–3.2)                   | 2.5 (2.2–2.8)                          | 2.6 (2.1–3.2)                    | 0.74    |
| LV longitudinal Strain LAX global, %, median (IQR) | -8 (-11; -5)                    | -8 (-14; -7)                           | -14 (-19; -10)                   | 0.001   |
| RV longitudinal Strain LAX global, %, median (IQR) | -15 (-19; -8)                   | -16 (-20; -8)                          | -25 (-26; -24)                   | <0.001  |
| T1 time septal, s, median (IQR)                    | 1178 (1150–1202)                | 1158 (1121–1190)                       | 1144 (1126–1183)                 | 0.03    |
| T1 time upper RVIP, s, median (IQR)                | 1170 (1120–1219)                | 1136 (1105–1199)                       | 1117 (1073–1130)                 | <0.001  |

|                                     |                  |                  |                  |       |
|-------------------------------------|------------------|------------------|------------------|-------|
| T1 time lower RVIP, s, median (IQR) | 1208 (1174–1259) | 1172 (1131–1226) | 1192 (1142–1225) | 0.001 |
|-------------------------------------|------------------|------------------|------------------|-------|

**Supplementary Table S2.** Multivariable regression analysis of predictors of 10-years mortality.

| <b>Model 1:</b> |                       |                   |               |
|-----------------|-----------------------|-------------------|---------------|
| <b>Variable</b> | <b><i>p</i>-value</b> | <b>Odds Ratio</b> | <b>95% CI</b> |
| PASP            | 0.21                  | 1.01              | 0.99–1.04     |
| LVEDd           | 0.01                  | 1.06              | 1.01–1.11     |
| LVEF            | 0.17                  | 0.97              | 0.93–1.01     |
| eGFR            | 0.11                  | 0.99              | 0.98–1.00     |
| Diabetes        | 0.13                  | 1.66              | 0.86–3.19     |
| Prior PCI       | 0.01                  | 2.22              | 1.20–4.13     |
| Age             | 0.08                  | 1.03              | 0.99–1.07     |
| <b>Model 2:</b> |                       |                   |               |
| <b>Variable</b> | <b><i>p</i> value</b> | <b>Odds Ratio</b> | <b>95% CI</b> |
| TAPSE/PASP      | 0.02                  | 0.12              | 0.02–0.71     |
| LVEDd           | 0.02                  | 1.05              | 1.01–1.10     |
| LVEF            | 0.48                  | 0.98              | 0.94–1.03     |
| eGFR            | 0.05                  | 0.99              | 0.98–1.01     |
| Diabetes        | 0.11                  | 1.71              | 0.89–3.28     |
| Prior PCI       | 0.01                  | 2.24              | 1.21–4.16     |
